# Supplementary material
Source: HighWire-hosted journal article supplement (https://jnis.bmj.com/highwire/filestream/168202/field_highwire_adjunct_files/0/neurintsurg-2021-017615supp001_data_supplement.pdf)
Supplement: neurintsurg-2021-017615supp001_data_supplement.pdf [file neurintsurg-2021-017615supp001_data_supplement.pdf]

## Supplemental Data

**Variables of blood pressure (BP):** (1) systolic and diastolic BP at admission; (2) mean systolic and diastolic BP of 24-h ambulatory BP monitoring (ABPM) 7±3 days within admission; (3) inadequate BP control, defined as mean systolic BP <140 mm Hg and mean diastolic BP <90 mm Hg for individuals without diabetes or mean systolic BP <130 mm Hg and mean diastolic BP <80 mm Hg for individuals with diabetes; and (4) antihypertensive agent used after ischemic stroke onset.

**Statin therapy** before and after stroke onset was recorded. Prior statin treatment was defined as any dose or type of statin therapy before stroke onset. Present intensive statin treatment was defined as rosuvastatin (20 mg/day) or atorvastatin (40 mg/day) after stroke onset.<sup>13</sup>

**Anterior or/and posterior circulation:** According to the vascular territory involved, we divided the infarction distribution into (1) anterior circulation; (2) posterior circulation; and (3) both anterior and posterior circulation.

**The location of the infarction** was divided into (1) superficial lesions, defined as lesions of gray matter or subcortical white matter of the frontal lobe, parietal lobe, temporal lobe, limbic lobe, or cerebellar hemispheres; (2) deep lesions, defined as lesions of the internal capsule, corona radiata, centrum semiovale, caudate nucleus, globus pallidus, putamen, mesencephalon, thalamus, pons, or cerebellar vermis; or (3) mixed lesions, defined as

multiple lesions involved both superficial and deep lesions at the same time.<sup>14</sup>

**Table 1. Hemorrhagic events of patients**

| <b>Hemorrhage event type</b> | <b><i>n</i> (%)</b> |
|------------------------------|---------------------|
| Hemorrhagic transformation   | 31 (3.6)            |
| HI                           | 25 (2.9)            |
| PH                           | 6 (0.7)             |
| sICH                         | 1 (0.1)             |
| Gastrointestinal hemorrhage  | 19 (2.2)            |
| Urethral hemorrhage          | 7 (0.8)             |
| Mouth hemorrhage             | 3 (0.3)             |
| Nose hemorrhage              | 1 (0.1)             |
| Fatal hemorrhagic events     | 0 (0.0)             |
| Time after onset (days)      | 14 [10–18.5]        |
| All patients                 | <i>n</i> =859       |

HI: hemorrhagic infarction; PH: parenchymal hematoma; sICH: symptomatic intracranial hemorrhage.

**Table 2. Association between infarction locations and hemorrhagic events**

|                  |                     | Univariate       |                 | Multivariate     |                 |
|------------------|---------------------|------------------|-----------------|------------------|-----------------|
|                  |                     | OR (95% CI)      | <i>p</i> -value | OR (95% CI)      | <i>p</i> -value |
| Hemorrhage event | Superficial lesions | Reference        |                 | Reference        |                 |
|                  | Deep lesions        | 0.85 (0.39–1.84) | 0.677           | 0.58 (0.24–1.38) | 0.219           |
|                  | Mix lesions         | 1.16 (0.72–3.67) | 0.238           | 0.81 (0.30–2.15) | 0.672           |

Abbreviations: CI, confidence interval; OR, odds ratio. Variables including D-dimer, fibrinogen, NIHSS, ADP inhibition rate, and infarction location were entered into the multivariate logistic regression model.

**Table 3. Association between blood pressure and hemorrhagic events**

| Characteristics                   | Non-hemorrhage<br>(n=798) | Hemorrhage<br>(n=61) | p-value |
|-----------------------------------|---------------------------|----------------------|---------|
| SBP at admission, mean [IQR]      | 145 [134–165]             | 145 [131–163]        | 0.555   |
| DBP at admission, mean [IQR]      | 84 [78–93]                | 85 [76–100]          | 0.466   |
| Mean SBP, mean [IQR]              | 143 [130–152]             | 137 [125–151]        | 0.350   |
| Mean DBP, mean [IQR]              | 85 [79–92]                | 86 [76–91]           | 0.852   |
| Inadequate BP control, n (%)      | 483(60.5)                 | 32 (52.1)            | 0.434   |
| <b>Antihypertensive Agent Use</b> |                           |                      |         |
| <b>After Index AIS, n (%)</b>     |                           |                      |         |
| Any agent used, n (%)             | 543 (68.0)                | 35.0 (57.4)          | 0.251   |
| Number of agents, n (%)           |                           |                      | 0.740   |
| None                              | 303 (38.0)                | 29 (47.5)            |         |
| 1                                 | 303 (38.0)                | 18 (29.5)            |         |
| 2                                 | 128 (16.0)                | 10 (16.4)            |         |
| ≥3                                | 64 (8.0)                  | 4 (6.6)              |         |
| <b>Drug class, n (%)</b>          |                           |                      |         |
| β-blocker                         | 64 (8.0)                  | 7 (11.5)             | 0.542   |
| ACE inhibitor                     | 16 (2.0)                  | 2 (3.3)              | 0.679   |
| ARB                               | 176 (22.0)                | 8 (13.1)             | 0.216   |
| Calcium channel blocker           | 463 (58.0)                | 33 (54.1)            | 0.680   |
| Diuretic                          | 32 (4.0)                  | 2 (3.3)              | 0.839   |

---

|       |          |          |       |
|-------|----------|----------|-------|
| Other | 64 (8.0) | 7 (11.5) | 0.542 |
|-------|----------|----------|-------|

---

Categorical variables are presented as  $n$  (%), and continuous variables are presented as the median [interquartile range];  $p < 0.05$  was considered statistically significant. Abbreviations: BP, blood pressure; SBP, systolic blood pressure; DBP, diastolic blood pressure; IQR, interquartile range; AIS, acute ischemic stroke; ACE, angiotensin-converting enzyme; ARB, angiotensin receptor blocker.

**Table 4. Analysis of the hematological data**

|                                    | <b>Non-hemorrhage</b><br>( <i>n</i> =798) | <b>Hemorrhage</b><br>( <i>n</i> =61) | <i>p</i> -value |
|------------------------------------|-------------------------------------------|--------------------------------------|-----------------|
| <b>Biochemical indexes</b>         |                                           |                                      |                 |
| Hcy (mmol/L)                       | 13.2 [10.7–16.6]                          | 12.6 [9.5–16.5]                      | 0.268           |
| TG (mmol/L)                        | 3.5 [2.8–4.2]                             | 3.6 [2.9–4.3]                        | 0.639           |
| TC (mmol/L)                        | 1.2 [1.0–1.8]                             | 1.2 [0.9–1.7]                        | 0.487           |
| HDL (mmol/L)                       | 0.9 [0.8–1.1]                             | 1.0 [0.7–1.1]                        | 0.700           |
| LDL-C (mmol/L)                     | 2.1 [1.5–2.7]                             | 2.2 [1.7–2.7]                        | 0.400           |
| ALT (mmol/L)                       | 17 [12.0–28.0]                            | 17.0 [13.0–21.0]                     | 0.511           |
| AST (mmol/L)                       | 19.0 [16.0–26.0]                          | 19.0 [17.0–25.0]                     | 0.922           |
| BUN (mmol/L)                       | 4.7 [3.8–5.7]                             | 4.5 [3.4–5.3]                        | 0.098           |
| Cr (umol/L)                        | 72.0 [62.0–84.0]                          | 70.0 [60.0–83.0]                     | 0.366           |
| eGFR (ml/min/1.73 m <sup>2</sup> ) | 94.9 [83.0–103.4]                         | 98.8 [86.6–107.0]                    | 0.074           |
| <b>Platelet indexes</b>            |                                           |                                      |                 |
| PLT (×10 <sup>9</sup> /L)          | 211 [177–254]                             | 222 [183–253]                        | 0.482           |
| PDW (fL)                           | 13.3 [11.9–15.2]                          | 12.9 [11.3–14.4]                     | 0.120           |
| MPV (L)                            | 10.9 [10.3–11.8]                          | 10.8 [10.0–11.5]                     | 0.132           |
| P-LCR (%)                          | 32.9 [27.6–39.9]                          | 31.1 [25.1–38.0]                     | 0.109           |
| PCT (%)                            | 0.2 [0.2–0.3]                             | 0.2 [0.2–0.3]                        | 0.845           |
| <b>Glucometabolic indexes</b>      |                                           |                                      |                 |
| Glu (mmol/L)                       | 5.2 [4.8–6.2]                             | 5.8 [4.9–7.4]                        | <b>0.012</b>    |

|                             |                  |                  |              |
|-----------------------------|------------------|------------------|--------------|
| HbA1c (%)                   | 5.8 [5.5–6.5]    | 5.8 [5.5–7.5]    | 0.366        |
| <b>Coagulation function</b> |                  |                  |              |
| PT (s)                      | 13.3 [12.9–13.8] | 13.3 [13.0–13.9] | 0.264        |
| PTA (%)                     | 99 [91–106]      | 97 [89–102]      | 0.107        |
| INR                         | 1.0 [1.0–1.1]    | 1.0 [1.0–1.1]    | 0.094        |
| FIB (g/L)                   | 3.2 [2.8–3.8]    | 3.7 [3.0–4.1]    | <b>0.002</b> |
| APTT (s)                    | 37.4 [34.9–40.0] | 37.6 [35.2–40.8] | 0.518        |
| TT (s)                      | 16.3 [15.8–17.1] | 16.4 [15.8–17.2] | 0.844        |
| D-dimer (mg/L)              | 0.3 [0.2–0.5]    | 0.5 [0.3–0.8]    | <b>0.011</b> |

Continuous variables are presented as the median [interquartile range];  $p < 0.05$  was considered statistically significant, which was obtained by Mann–Whitney  $U$ -tests. Abbreviations: Hcy, homocysteine; TG, triglyceride; TC, total cholesterol; HDL, high-density lipoprotein; LDL-C, low-density lipoprotein cholesterol; ALT, alanine transaminase; AST, asparagine transaminase; BUN, blood urea nitrogen; Cr, serum creatinine; eGFR, glomerular filtration rate; Glu, blood glucose; HbA1c, glycosylated hemoglobin; PLT, platelet count; PDW, platelet distribution width; MPV, mean platelet volume; P-LCR, platelet large cell ratio; PCT, thrombocytocrit; PT, prothrombin time; PTA, prothrombin activity; INR, international normalized ratio; FIB, fibrinogen; APTT, activated partial thromboplastin time; TT, thrombin time.

**Table 5. Association of TEG parameters with hemorrhagic events**

|                                      | Non-hemorrhage<br>(n=798) | Hemorrhage<br>(n=61) | <i>p</i> -value |
|--------------------------------------|---------------------------|----------------------|-----------------|
| <b>R (min)</b>                       | 5.6 [4.9–6.3]             | 5.8 [4.9–6.9]        | 0.101           |
| <b>K (min)</b>                       | 1.4 [1.2–1.7]             | 1.5 [1.2–1.7]        | 0.123           |
| <b><math>\alpha</math>-Angle (°)</b> | 74.5 [72.0–76.7]          | 73.5 [71.5–75.6]     | 0.070           |
| <b>MA (mm)</b>                       | 62.4 [58.7–65.9]          | 62.9 [58.9–66.5]     | 0.411           |
| <b>MA<sub>ADP</sub> (mm)</b>         | 32.2 [18.9–42.3]          | 22.0 [12.9–41.4]     | <b>0.033</b>    |
| <b>ADP% (%)</b>                      | 58.7 [38.7–81.6]          | 78.6 [45.5–93.9]     | <b>0.012</b>    |
| <b>AA% (%)</b>                       | 97.3 [86.1–100]           | 94.3 [74.6–100]      | 0.092           |

Continuous variables are presented as the median [interquartile range];  $p < 0.05$  was considered statistically significant, which was obtained by Mann–Whitney *U*-test.

Abbreviations: R, reaction time; K, clot formation time; MA, maximum amplitude; MA<sub>ADP</sub>, ADP-induced platelet-fibrin clot maximum amplitude; ADP%, ADP inhibition rate; AA%, AA inhibition rate



**Table 6. Data of the population with stenosis**

| Characteristics                           | All<br>( <i>n</i> =315) | Non-hemorrhage<br>( <i>n</i> =282) | Hemorrhage<br>( <i>n</i> =33) | <i>p</i> -value |
|-------------------------------------------|-------------------------|------------------------------------|-------------------------------|-----------------|
| <b>Location of stenosis, <i>n</i> (%)</b> |                         |                                    |                               | 1.000           |
| Anterior circulation                      | 217 (68.9)              | 199 (70.6)                         | 18 (54.5)                     |                 |
| Posterior circulation                     | 95 (30.2)               | 81 (28.7)                          | 14 (42.4)                     |                 |
| Anterior and posterior<br>circulation     | 3 (0.9)                 | 2 (0.7)                            | 1 (3.0)                       |                 |

Categorical variables are presented as *n* (%). *p*<0.05 was considered statistically significant.

**Table 7. Predictors for hemorrhagic events in stenosis population**

|                   | Univariate       |                 | Multivariate     |                 |
|-------------------|------------------|-----------------|------------------|-----------------|
|                   | OR (95% CI)      | <i>p</i> -value | OR (95% CI)      | <i>p</i> -value |
| NIHSS             | 1.15 (1.04–1.26) | 0.005           | 1.15 (1.04–1.28) | 0.006           |
| LDL-C             | 1.65 (1.13–2.41) | 0.009           | –                | –               |
| eGFR              | 1.03 (1.00–1.05) | 0.033           | 1.04 (1.01–1.07) | 0.003           |
| Glu               | 1.18 (1.00–1.39) | 0.041           | 1.27 (1.05–1.55) | 0.017           |
| MA <sub>ADP</sub> | 0.96 (0.94–0.99) | 0.004           | –                | –               |
| ADP%              | 1.02 (1.00–1.04) | 0.004           | 1.03 (1.00–1.04) | 0.005           |

Variables with  $p < 0.05$  in the univariate analysis were put into the multivariate logistic regression model. Abbreviations: CI, confidence interval; OR, odds ratio; NIHSS, National Institutes of Health Stroke Scale; LDL-C, low-density lipoprotein cholesterol; eGFR, glomerular filtration rate; Glu, blood glucose; MA<sub>ADP</sub>, ADP-induced platelet-fibrin clot maximum amplitude; ADP%, ADP inhibition rate.

**Table 8. Predictors of hemorrhagic events in patients with anterior circulation stenosis**

|       | Univariate       |                 | Multivariate     |                 |
|-------|------------------|-----------------|------------------|-----------------|
|       | OR (95% CI)      | <i>p</i> -value | OR (95% CI)      | <i>p</i> -value |
| TG    | 1.82 (1.14–2.89) | 0.011           | 1.18 (1.10–2.87) | 0.019           |
| LDL-C | 1.89 (1.13–3.13) | 0.015           | –                | –               |
| ADP%  | 1.02 (1.00–1.05) | 0.025           | 1.02 (1.00–1.04) | 0.034           |

Variables with  $p < 0.05$  in the univariate analysis were entered into the multivariate logistic regression model. Abbreviations: CI, confidence interval; OR, odds ratio; TG, triglyceride; LDL-C, low-density lipoprotein cholesterol; ADP%, ADP inhibition rate.

**Table 9. Predictors of hemorrhagic events in patients with posterior circulation stenosis**

|                   | Univariate       |                 | Multivariate     |                 |
|-------------------|------------------|-----------------|------------------|-----------------|
|                   | OR (95% CI)      | <i>p</i> -value | OR (95% CI)      | <i>p</i> -value |
| NIHSS             | 1.19 (1.02–1.38) | 0.003           | 1.22 (1.03–1.44) | 0.019           |
| Angle             | 0.87 (0.75–0.96) | 0.011           | 0.84 (0.73–0.96) | 0.009           |
| MA                | 0.89 (0.81–0.99) | 0.035           | –                | –               |
| MA <sub>ADP</sub> | 0.96 (0.92–1.00) | 0.044           | –                | –               |
| ADP%              | 1.02 (0.99–1.04) | 0.160           | –                | –               |

Variables with  $p < 0.05$  in the univariate analysis were entered into the multivariate logistic regression model. Abbreviations: CI, confidence interval; OR, odds ratio; NIHSS, National Institutes of Health Stroke Scale; MA, maximum amplitude; MA<sub>ADP</sub>, ADP-induced platelet-fibrin clot maximum amplitude; ADP%, ADP inhibition rate.

**Figure 1. Quartile distributions of hemorrhagic events for TEG parameters.**

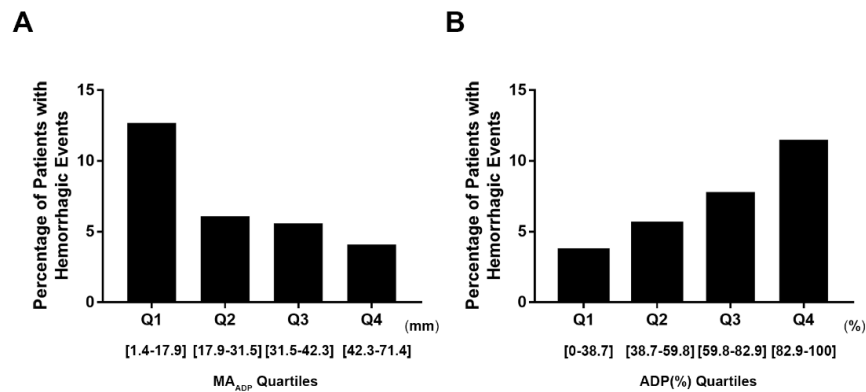

A chi-square test was used to compare the percentage of hemorrhagic events in each quartile (Q1–Q4), which revealed significant differences ( $p < 0.05$ ). **A.** The percentage of hemorrhagic events was negatively correlated with MA<sub>ADP</sub> as follows: Q1: [1.4–17.9] mm; Q2: [17.9–31.5] mm; Q3: [31.5–42.3] mm; Q4: [42.3–71.37] mm. **B.** The percentage of hemorrhagic events was positively correlated with ADP% as follows: Q1: [0–38.7]%; Q2: [38.7–59.8]%; Q3: [59.8–82.9]%; Q4: [82.9–100]%
